# Supplementary material for: Sensitivity and Specificity of a Short Scale for Assessing Psychological Violence in Peruvian Health Professionals
Source: Research Square preprint supplement (doi:10.21203/rs.3.rs-646009/v1), 2021-06-24
Supplement: Supplementary file 1 [file 1bc9d1d3b7a87e3002f079e7.xlsx]

## Sheet: BaseDatos_SE_EVP_salud
Additional file 2. Data set on variables of psychological violence at work (PVW), job satisfaction (JS) and socio-occupational variables. Health centres in Peru, 2019-2020
Cód	EESS	Prof	AreaW	Tserv	ED	CondLab	Sex	GO	I1_18	I2_20	I3_19	I4_12	I5_17	I6_14	I7_22	I8_21	I9_15	I10_13	I11_11	I12_7	I13_2	I14_1	I15_6	I16_5	I17_4	I18_16	I19_9	I20_3	I21_8	I22_10	T_VPs	I23AV	I25MH	TOT_VP	GRU	SI1	SI2	SI3	SI4	SI5	SI6	SI7	TOT_SI	SE_8	SE_9	SE_10	SE_11	SE_12	SE_13
248	13	4	4	21	51	1	1	1	4	4	3	4	4	3	3	4	4	4	3	3	3	3	2	3	3	3	3	3	4	2	72	1	1	74	1	6	5	5	3	4	4	1	28	3	3	4	3	2	4
301	12	8	12	8	34	1	1	1	4	4	3	4	4	3	4	3	3	3	4	1	3	2	2	3	3	3	3	3	3	1	66	3	3	72	1	6	5	5	3	4	4	1	28	3	4	4	3	4	5
213	10	9	8	6	32	1	2	1	3	3	3	3	4	3	3	3	4	3	1	3	3	3	3	3	3	3	1	1	1	1	58	3	1	62	1	5	5	6	4	4	4	1	29	5	5	5	4	4	4
302	12	8	12	7	33	1	1	1	4	4	3	4	4	3	4	3	3	3	4	1	2	2	1	3	3	3	3	3	3	1	64	3	3	70	1	6	6	6	3	4	4	1	30	3	5	5	5	5	5
002	1	6	21	5	30	3	1	1	3	2	2	3	3	2	4	4	4	4	4	1	4	1	2	1	1	2	4	2	3	2	58	3	1	62	1	5	6	5	4	4	5	1	30	3	4	4	6	5	6
212	10	4	3	7	31	2	2	1	3	3	3	3	4	3	3	3	4	3	1	1	3	1	1	1	3	3	3	4	3	3	59	1	3	63	1	6	6	6	3	4	5	1	31	5	4	5	5	5	4
214	10	8	12	20	50	1	2	1	1	3	3	3	3	3	1	3	3	3	3	1	3	3	3	3	3	3	1	3	3	3	58	4	3	65	1	6	4	6	3	4	5	1	29	3	4	5	4	6	6
198	10	8	13	10	37	2	1	1	4	3	4	3	4	3	2	3	3	3	3	1	3	3	3	3	3	3	1	3	3	3	64	1	1	66	1	5	6	6	3	4	5	1	30	2	7	4	5	5	5
209	10	8	22	8	34	1	2	1	4	4	3	4	4	3	4	3	3	2	4	1	2	2	1	3	3	3	3	3	3	1	63	3	3	69	1	6	6	6	3	4	5	1	31	3	5	5	5	5	5
210	10	8	22	8	34	1	2	1	4	4	3	3	4	3	3	3	3	1	4	1	1	1	1	3	3	3	3	3	1	1	56	3	1	60	1	6	6	6	3	4	5	1	31	3	6	3	7	7	4
206	10	5	3	17	47	1	1	1	3	3	3	3	4	3	3	4	3	4	1	1	3	1	1	4	3	3	1	1	3	3	58	1	1	60	1	6	6	6	3	4	5	1	31	4	4	4	6	6	6
203	10	3	10	27	56	1	2	2	4	4	3	3	4	3	3	3	3	3	1	1	3	3	1	1	3	3	2	1	2	4	58	4	2	64	1	6	6	6	3	4	5	1	31	4	5	4	6	5	6
241	13	8	3	23	53	1	2	1	4	4	3	3	3	1	4	3	3	3	1	1	3	3	3	3	3	3	3	3	3	3	63	1	1	65	1	6	6	6	3	4	5	1	31	4	5	6	5	5	5
003	1	3	2	12	36	1	1	2	2	2	1	1	2	2	1	1	2	2	1	1	1	2	1	1	2	3	2	1	2	2	35	3	2	40	1	6	6	5	6	6	6	4	39	5	5	4	3	2	4
201	10	8	13	13	40	1	1	1	3	3	3	3	3	3	1	3	3	3	4	1	3	1	3	1	3	3	1	3	1	1	53	3	3	59	1	6	6	6	3	4	6	1	32	2	5	5	6	6	5
211	10	8	22	8	34	1	2	1	3	3	3	1	4	3	3	3	4	3	1	3	3	3	3	3	3	1	1	1	1	1	54	3	1	58	1	6	4	6	6	6	6	1	35	4	5	5	6	5	4
065	3	8	4	22	52	1	2	1	1	2	2	2	1	1	2	1	2	2	3	1	1	2	2	1	2	2	2	1	2	2	37	2	1	40	0	6	6	6	6	5	5	4	38	5	5	5	5	5	5
022	1	7	11	1	24	3	1	2	1	1	3	3	3	2	1	1	1	2	1	1	1	2	3	2	2	1	1	1	1	1	35	4	2	41	0	7	7	7	6	5	6	4	42	5	5	4	5	5	4
239	13	9	8	6	32	1	2	1	4	4	3	3	4	3	3	3	3	1	4	1	1	1	1	3	3	3	1	3	1	1	54	3	1	58	1	6	6	6	6	5	4	1	34	3	7	6	7	4	6
057	2	3	14	1	25	2	2	2	1	2	1	2	2	2	1	1	2	2	2	2	2	2	2	1	1	2	1	1	2	2	36	3	1	32	1	6	6	6	6	6	6	3	39	5	5	5	5	5	5
096	20	6	21	3	30	2	1	1	1	1	2	1	3	2	2	2	3	2	1	2	1	1	1	1	1	1	1	2	2	1	34	4	2	40	1	6	6	6	6	6	6	3	39	5	5	5	5	5	5
114	5	8	12	7	33	2	1	1	1	1	4	1	2	2	1	2	2	2	2	2	2	2	2	2	1	1	1	1	1	1	36	3	1	40	1	7	7	5	6	6	5	4	40	6	5	5	5	5	4
001	1	1	1	28	57	1	2	2	1	2	1	1	2	2	2	2	1	2	2	1	2	2	2	2	2	2	2	2	1	1	37	2	1	40	1	6	6	5	6	6	6	4	39	5	5	5	5	5	5
235	13	8	22	8	34	1	2	1	3	4	1	3	3	3	1	3	3	3	1	1	3	2	1	1	3	3	1	1	1	3	48	3	1	52	1	6	4	6	6	5	5	1	33	5	7	3	7	6	6
208	10	8	22	8	34	1	2	1	3	4	3	3	3	3	3	3	3	1	3	1	1	1	1	3	3	3	1	2	1	1	50	2	1	53	1	6	6	5	6	4	6	1	34	5	6	5	6	5	5
122	5	4	12	6	30	3	2	1	2	2	2	3	2	2	2	2	2	1	1	1	1	2	1	1	1	1	1	2	1	1	34	2	1	37	0	6	6	6	6	6	5	3	38	5	6	6	5	5	5
019	1	2	22	8	32	3	2	2	2	2	1	2	1	1	1	2	2	1	2	2	2	2	1	1	2	1	2	1	1	2	34	3	1	38	0	6	6	5	6	6	5	4	38	5	6	5	5	6	6
229	13	3	10	27	56	1	2	2	3	3	1	1	1	1	1	3	3	3	1	1	3	3	1	1	2	2	1	1	1	2	39	3	1	43	1	6	6	5	6	5	5	4	37	7	6	5	4	6	5
234	13	8	22	8	34	1	2	1	4	4	3	3	4	1	3	3	1	1	4	1	1	1	1	3	3	3	1	3	1	1	50	3	1	54	1	6	6	6	6	5	5	1	35	4	7	2	6	7	6
237	13	8	22	8	34	1	2	1	4	4	3	3	4	1	3	3	1	1	4	1	1	1	1	3	3	3	1	3	1	1	50	3	1	54	1	6	5	4	6	4	6	2	33	4	6	4	6	5	7
064	3	2	22	8	31	1	1	2	1	1	2	3	1	2	1	2	2	2	3	1	2	1	1	2	1	2	1	1	2	2	36	2	1	39	1	7	7	7	6	6	6	4	43	5	6	5	5	5	4
056	2	8	12	1	27	2	2	1	2	1	2	2	2	1	1	1	1	1	1	2	2	1	1	2	2	2	1	1	2	2	33	2	1	36	1	6	6	5	6	6	6	4	39	6	5	5	4	6	6
094	20	1	1	2	27	3	2	1	2	2	2	2	3	2	2	1	2	2	1	1	2	2	1	1	1	2	1	1	1	1	35	2	1	38	1	6	6	6	6	5	6	4	39	5	7	4	5	5	5
133	21	4	26	2	28	2	2	1	2	2	2	3	2	2	1	1	2	2	1	1	1	2	1	1	2	2	2	1	1	1	35	2	1	38	1	6	6	6	6	5	6	4	39	5	6	4	6	5	6
013	1	8	12	18	48	1	2	1	1	1	2	1	1	1	1	1	1	1	1	1	1	2	2	4	4	1	2	2	2	2	35	2	1	38	1	6	5	6	6	6	6	4	39	5	6	5	5	6	6
222	13	17	26	1	27	2	2	1	1	1	1	3	2	2	1	1	2	3	2	2	2	1	1	2	2	2	1	2	3	2	39	2	1	42	1	6	6	5	6	6	6	3	38	6	6	6	5	5	4
129	21	5	3	17	47	1	1	1	2	2	1	1	3	2	2	3	2	3	1	1	2	1	1	3	2	1	1	1	2	2	39	2	1	42	1	6	6	5	6	4	5	4	36	6	6	4	7	6	6
100	4	8	23	10	36	1	2	1	2	1	2	2	3	2	2	2	3	2	1	1	2	1	1	1	1	1	2	3	2	2	39	2	2	43	1	6	5	5	6	6	6	5	39	7	6	5	5	4	6
231	13	3	10	27	56	1	2	2	2	3	2	2	3	1	1	2	2	2	1	1	2	2	1	1	2	2	1	1	1	4	39	3	1	43	1	6	6	6	6	5	6	4	39	6	6	4	5	5	5
108	5	4	12	19	49	2	1	1	2	2	3	2	3	1	1	2	2	2	2	1	1	1	1	3	1	1	1	1	2	2	37	3	2	42	1	7	7	7	6	5	6	4	42	6	6	5	4	5	5
111	5	8	12	2	28	3	2	1	2	2	2	2	2	2	2	1	2	1	2	2	1	1	1	1	2	2	1	1	1	2	35	3	2	35	1	6	6	6	6	6	6	3	39	6	6	6	7	6	4
223	13	17	26	1	27	2	2	1	2	2	2	1	2	2	2	2	2	2	1	2	2	1	2	2	1	2	2	1	2	1	38	2	1	41	0	6	5	6	6	6	6	4	39	7	5	5	6	5	5
093	20	4	10	1	25	1	1	1	1	2	2	1	1	1	1	1	2	2	2	2	2	2	1	2	2	2	1	2	2	2	36	3	2	41	0	6	5	5	6	6	6	5	39	6	6	4	5	6	5
089	20	16	21	1	28	4	2	1	2	3	2	2	2	1	2	2	2	2	1	2	1	1	2	1	1	2	2	2	1	1	37	3	1	41	0	6	6	5	6	6	6	3	38	5	5	5	7	6	6
188	10	4	22	4	29	1	1	1	1	1	1	3	2	3	1	3	1	3	3	3	1	1	1	1	3	3	1	1	1	1	39	1	1	41	1	6	6	3	6	6	6	5	38	6	6	6	5	5	6
124	5	6	12	3	29	3	2	1	2	3	1	2	2	1	1	2	2	2	2	1	2	2	2	2	2	2	1	2	2	1	39	2	2	43	1	6	6	5	6	6	5	4	38	6	6	5	6	5	5
126	21	4	3	7	32	2	2	1	2	2	1	1	3	1	1	2	2	1	1	1	2	2	3	2	2	1	1	4	2	2	39	3	1	43	1	6	6	6	6	5	5	4	38	5	6	5	6	5	6
024	1	4	4	21	51	1	1	1	2	2	1	3	2	1	1	2	3	2	2	2	2	1	2	1	1	1	1	3	3	2	40	2	1	43	1	6	6	6	6	6	5	3	38	5	6	5	6	5	6
009	1	8	3	2	28	2	2	1	1	1	2	3	1	2	3	3	1	1	1	3	1	1	1	2	1	3	2	2	1	3	39	3	4	46	1	6	6	5	4	6	6	4	37	5	7	4	5	6	6
196	10	17	26	1	27	2	2	1	4	4	1	4	4	3	1	3	4	1	1	1	1	1	1	1	3	3	1	1	1	1	45	1	1	47	1	5	6	5	6	6	6	4	38	6	6	2	6	5	6
224	13	8	13	10	37	2	1	1	1	3	1	3	4	3	1	3	4	4	3	1	1	1	1	1	3	3	1	1	1	1	45	1	1	47	1	6	6	5	6	6	6	4	39	7	6	5	5	5	5
207	10	5	3	17	47	1	1	1	4	4	3	3	4	1	3	3	1	1	3	1	1	1	1	3	3	3	1	3	1	1	49	3	1	53	1	6	4	6	6	5	5	1	33	4	6	4	7	7	7
119	5	6	12	3	29	2	1	1	3	3	3	2	2	1	2	2	2	2	2	2	1	2	3	1	2	2	1	2	4	4	48	2	4	54	1	6	5	5	6	5	5	1	33	5	7	3	7	6	7
232	13	5	3	17	47	1	1	1	3	3	1	1	4	3	3	4	3	4	1	1	3	1	1	4	3	1	1	1	3	3	52	1	1	54	1	5	6	6	6	4	5	1	33	5	7	3	7	7	6
110	5	8	12	3	29	3	2	1	1	2	2	1	2	1	2	2	2	2	1	1	2	1	2	2	2	2	1	2	2	2	37	2	1	40	0	6	6	6	6	6	6	3	39	6	6	6	6	5	6
008	1	4	8	3	29	3	1	1	2	1	1	2	2	2	2	1	2	2	2	2	2	2	2	1	2	1	1	1	2	2	37	3	1	41	0	6	6	3	6	6	6	5	38	6	4	5	7	6	6
099	4	4	23	21	51	1	2	1	3	3	1	3	4	3	1	1	3	1	1	1	1	1	1	1	3	3	1	1	1	1	39	1	1	41	1	6	5	6	6	6	6	4	39	6	5	6	7	6	5
011	1	5	5	9	35	1	2	1	2	2	1	1	3	2	2	3	2	3	1	1	2	1	1	3	2	1	1	1	2	2	39	2	1	42	1	6	6	6	6	6	6	3	39	6	5	5	7	6	6
098	4	6	23	1	29	2	1	1	2	2	2	1	2	2	1	1	2	3	2	2	2	2	1	2	2	2	1	2	3	1	40	2	1	43	1	6	6	6	6	6	5	3	38	6	6	5	6	5	6
121	5	4	12	7	31	3	2	1	1	1	1	3	3	2	2	2	3	2	3	2	1	1	1	2	1	3	2	1	1	2	40	2	1	43	1	6	6	6	6	4	6	4	38	6	6	5	6	5	6
230	13	3	10	27	56	1	2	2	2	3	1	1	1	1	1	2	2	2	1	1	3	3	1	1	3	3	1	1	1	4	39	4	1	44	1	6	5	5	6	4	6	4	36	5	7	5	6	6	7
187	10	4	22	4	29	1	1	1	1	2	2	2	2	2	1	2	2	2	2	1	2	2	2	2	2	2	1	2	2	2	40	3	2	45	1	6	6	6	6	6	5	3	38	5	6	4	6	6	6
101	4	6	23	2	30	2	1	1	1	1	1	1	3	3	2	1	3	2	2	2	2	2	2	2	1	2	2	2	3	3	43	2	1	46	1	6	6	6	6	6	5	3	38	6	6	5	6	5	4
116	5	4	12	6	30	3	2	1	2	1	2	2	1	2	2	2	2	2	2	2	2	2	2	2	2	2	2	2	2	2	42	2	2	46	1	5	6	6	6	6	5	4	38	6	6	4	7	6	5
14	1	7	11	1	24	1	1	2	2	3	1	3	2	2	1	1	3	1	1	1	3	2	4	2	2	2	2	4	2	2	46	1	1	48	1	6	6	5	6	6	5	4	38	6	6	4	5	6	6
113	5	4	12	4	29	3	1	1	2	2	2	3	2	2	1	1	3	3	2	1	2	2	2	2	1	2	3	2	3	1	44	2	2	48	1	5	6	6	6	5	6	4	38	6	6	5	6	5	5
199	10	4	12	12	36	1	1	1	3	4	3	3	3	3	1	3	3	1	1	1	1	1	1	3	3	3	1	1	3	1	47	3	1	51	1	5	5	6	6	6	5	1	34	5	7	3	7	7	6
204	10	3	10	27	56	1	2	2	4	4	3	3	3	1	3	3	1	1	3	1	1	1	1	3	3	3	1	3	1	1	48	3	1	52	1	6	6	6	6	5	6	1	36	5	7	4	7	5	6
005	1	2	22	7	31	3	2	2	1	2	2	3	2	2	1	3	3	4	1	4	2	2	1	2	2	1	3	2	2	2	47	3	3	53	1	6	5	6	6	5	5	1	34	5	7	5	7	6	6
233	13	5	3	17	47	1	1	1	3	3	1	1	4	3	3	4	3	4	1	1	3	1	1	4	3	1	1	1	3	3	52	1	1	54	1	6	6	6	6	5	6	1	36	4	7	2	7	7	5
120	5	6	12	3	29	2	1	1	2	2	1	4	2	1	1	1	2	3	3	2	1	3	2	2	2	4	3	2	4	4	51	3	2	56	1	6	6	6	6	5	5	1	35	5	7	2	7	7	5
240	13	8	12	20	50	1	2	1	3	3	3	1	3	3	3	3	3	3	1	3	3	1	3	3	1	3	3	1	3	1	54	1	1	56	1	6	6	6	6	4	5	1	34	5	6	4	6	6	7
238	13	4	3	7	32	2	2	1	3	4	3	3	3	3	1	3	3	3	1	1	3	3	1	1	3	3	1	1	1	4	52	4	1	57	1	6	6	6	6	5	5	1	35	5	6	4	7	4	7
205	10	3	10	27	56	1	2	2	3	1	3	3	4	3	3	3	4	3	1	1	3	1	1	1	1	1	3	4	3	3	53	1	3	57	1	6	6	6	6	5	6	1	36	6	7	3	6	6	6
061	20	4	5	20	50	1	1	1	1	1	4	2	1	2	1	2	1	1	2	1	2	2	1	2	2	2	1	1	2	2	36	3	1	40	0	7	7	7	6	6	5	4	42	5	5	5	5	5	5
078	3	2	13	10	35	1	1	2	1	2	2	2	3	2	1	2	2	2	2	1	1	1	1	3	2	2	1	1	1	2	37	3	2	42	1	7	7	7	6	6	5	4	42	7	6	5	5	4	6
130	21	5	3	17	47	1	1	1	3	3	1	3	4	3	1	1	3	1	1	1	1	2	1	1	3	3	1	1	1	1	40	1	1	42	1	6	6	6	6	5	6	3	38	6	6	5	6	5	6
104	5	8	12	4	31	3	2	1	3	2	2	2	1	2	1	1	2	2	2	1	2	2	2	1	1	2	1	2	2	2	38	4	2	44	1	6	6	6	6	6	6	3	39	6	7	5	6	5	5
227	13	8	13	13	41	1	1	1	2	1	2	1	2	1	1	2	3	3	3	1	3	1	3	1	1	1	1	3	1	1	38	3	3	44	1	6	6	6	6	6	5	3	38	5	7	5	5	5	7
194	10	17	26	28	57	1	1	1	1	3	1	3	3	3	1	3	4	4	3	1	1	1	1	1	3	3	1	1	1	1	44	1	1	46	1	5	6	6	6	5	5	4	37	5	6	5	7	7	7
112	5	8	12	5	32	2	2	1	2	2	1	1	1	3	2	1	3	3	2	2	2	2	2	2	2	2	2	2	2	2	43	3	3	49	1	6	6	5	6	6	6	4	39	6	6	3	6	6	6
236	13	8	22	8	34	1	2	1	3	3	1	3	3	3	3	3	3	3	1	1	3	1	1	3	3	2	1	1	3	3	51	1	1	53	1	6	6	6	6	4	6	1	35	5	6	3	7	6	7
246	13	4	8	3	29	3	1	1	3	3	2	2	2	2	2	2	2	2	1	1	3	3	3	3	3	3	3	3	3	3	54	1	1	56	1	6	4	6	6	6	6	1	35	5	7	4	7	4	7
215	10	8	3	23	53	1	2	1	1	2	2	2	2	2	1	2	2	2	2	1	3	3	3	3	3	3	1	3	3	3	49	4	3	56	1	6	6	6	6	5	5	1	35	4	7	5	7	7	5
128	21	8	12	20	50	1	2	1	1	3	2	3	4	3	1	3	3	1	2	1	2	2	1	1	3	3	1	1	1	1	43	1	1	45	1	6	6	6	6	6	5	4	39	6	7	5	5	6	6
190	10	16	13	10	37	1	2	1	1	1	1	3	3	2	2	2	2	1	3	1	3	1	3	1	3	4	1	1	3	3	45	1	1	47	1	6	6	5	6	6	5	4	38	6	7	3	6	6	6
192	10	8	12	11	37	1	1	1	1	1	3	3	2	3	1	3	3	1	1	1	1	1	1	1	3	3	1	1	4	1	40	3	4	47	1	6	6	5	6	6	6	2	37	6	7	4	6	6	6
228	13	8	13	10	37	2	1	2	1	3	3	3	4	3	1	3	3	1	3	3	1	3	1	3	3	1	1	1	1	1	47	1	1	49	1	5	6	6	6	6	6	2	37	4	7	6	7	7	6
200	10	4	12	12	36	1	1	1	2	3	2	2	3	2	2	2	2	3	2	2	2	2	2	2	2	2	2	1	2	2	46	2	2	50	1	6	4	6	6	6	6	2	36	5	7	5	7	7	5
084	20	16	21	1	29	4	2	1	1	2	3	2	3	3	1	2	1	2	2	1	2	1	1	3	2	2	1	1	1	1	38	2	1	41	0	7	7	7	6	6	5	4	42	5	6	6	6	5	5
186	10	8	13	10	36	2	1	1	1	1	1	3	4	3	1	3	3	3	3	3	1	1	1	1	3	3	1	1	1	1	43	1	1	45	1	6	6	6	6	6	6	3	39	5	7	5	6	6	6
195	10	16	13	10	37	1	2	1	1	3	1	4	3	2	1	2	2	1	3	1	3	1	3	1	3	3	1	1	3	3	46	1	1	48	1	6	6	6	6	6	6	3	39	6	5	3	6	6	7
069	3	11	18	30	57	1	1	1	3	3	3	3	3	3	1	3	3	1	1	1	1	1	1	3	3	3	1	1	3	1	46	3	1	50	1	6	6	6	6	6	6	3	39	6	6	4	6	6	6
202	10	8	13	10	37	2	1	1	1	3	3	3	4	3	1	3	3	1	3	3	1	3	1	3	3	3	1	1	1	1	49	1	1	51	1	6	6	6	6	6	6	2	38	5	7	4	7	6	5
197	10	17	26	1	27	2	2	1	3	4	1	4	4	3	1	3	3	1	1	1	1	1	1	1	4	4	1	1	1	1	45	1	1	47	1	6	6	6	6	6	5	3	38	6	6	4	6	6	6
189	10	12	19	30	60	1	1	2	1	3	1	3	4	3	1	3	3	1	1	1	1	1	1	1	3	3	1	1	1	1	39	4	4	47	1	6	6	6	6	5	5	4	38	6	7	4	7	6	6
191	10	4	26	2	27	2	2	1	1	1	1	3	3	3	1	3	3	1	1	3	3	1	1	3	3	3	1	1	2	3	45	1	1	47	1	5	6	6	6	5	6	4	38	6	7	2	7	7	6
193	10	17	26	28	57	1	1	1	1	3	3	3	4	3	1	3	3	1	3	1	3	3	1	1	1	3	1	1	1	1	45	1	1	47	1	6	5	6	6	6	6	4	39	6	7	6	6	7	5
225	13	4	12	12	36	1	1	1	3	3	3	3	3	3	1	3	3	1	1	1	1	1	1	3	1	3	1	1	3	1	44	3	1	48	1	6	6	6	6	6	6	3	39	7	6	4	6	6	7
226	13	4	12	12	36	1	1	1	3	3	3	3	3	3	1	3	3	1	1	1	1	1	1	3	1	3	1	1	3	1	44	3	1	48	1	6	6	6	6	6	6	3	39	5	7	5	6	7	7
117	5	8	12	1	27	3	2	1	2	2	1	1	1	1	1	1	1	1	1	2	1	1	1	1	1	2	1	1	1	1	26	4	1	31	0	6	7	6	6	6	5	4	40	7	5	5	5	6	7
115	5	8	12	3	29	3	1	1	1	1	1	2	1	1	1	1	1	2	1	1	1	1	2	1	1	1	1	1	3	1	27	3	1	31	0	7	7	6	6	6	6	5	43	7	5	4	7	6	6
039	1	8	3	12	38	1	2	1	1	1	1	1	1	1	1	1	1	1	1	1	2	1	1	1	1	1	1	1	1	1	23	4	4	31	1	7	7	7	6	6	6	4	43	6	5	4	5	7	7
018	1	4	7	30	57	1	2	1	1	1	2	1	1	2	1	2	1	2	1	1	1	1	1	1	1	1	1	1	1	1	26	3	2	31	0	7	7	7	6	5	6	4	42	7	5	5	5	6	7
042	1	3	17	2	27	3	2	2	1	1	1	1	2	1	1	1	1	2	1	1	1	1	2	1	1	1	1	1	2	1	26	4	1	31	0	7	6	7	6	6	6	5	43	7	5	4	6	6	7
105	5	8	12	8	34	2	2	1	1	2	1	1	2	1	2	2	1	1	1	1	1	1	1	1	1	1	1	2	1	1	27	3	1	31	1	7	7	7	6	6	6	4	43	7	5	5	5	6	7
029	1	6	8	22	53	1	1	1	1	1	1	1	1	1	1	1	2	2	1	1	2	2	1	1	1	1	1	1	1	2	27	3	1	31	1	7	7	7	6	6	6	4	43	7	5	5	5	6	7
040	1	7	11	2	27	3	1	2	1	1	1	1	1	1	1	1	1	3	1	1	1	1	3	2	1	1	1	1	1	1	27	4	1	32	0	7	7	7	5	6	6	4	42	7	6	3	7	7	6
058	2	1	20	1	25	2	1	1	1	2	2	3	2	1	1	1	2	1	1	1	1	1	1	4	2	2	1	1	1	3	35	3	1	39	1	7	7	7	6	5	6	4	42	6	6	5	7	7	7
021	1	5	5	2	29	1	2	2	1	1	1	2	1	1	1	1	2	1	1	1	1	1	1	1	1	1	1	1	1	2	25	3	1	29	0	7	7	7	6	6	5	4	42	6	7	5	7	6	7
043	1	3	10	2	28	3	1	2	1	2	1	1	2	1	1	1	1	1	1	1	2	2	1	1	1	1	1	1	1	1	26	2	1	29	0	7	7	7	6	5	6	5	43	7	6	4	6	6	7
118	5	8	12	5	32	3	2	1	1	2	2	1	1	1	1	1	1	1	1	1	1	1	2	1	1	1	1	1	1	1	25	3	2	30	0	6	7	7	6	6	6	4	42	6	7	6	7	6	6
023	1	5	3	6	32	1	2	1	1	1	1	1	1	2	1	1	1	1	1	2	1	1	2	2	1	1	1	1	2	1	27	3	1	31	0	7	7	7	6	6	6	4	43	7	5	5	7	7	6
015	1	3	10	1	24	4	1	2	1	1	1	2	1	1	1	2	1	1	1	1	2	2	1	1	1	3	1	2	1	1	29	2	1	32	0	7	7	7	6	6	6	4	43	6	6	5	7	6	6
125	5	4	12	1	25	3	2	1	1	1	1	3	1	1	1	1	1	1	1	1	2	2	1	1	1	3	1	2	1	1	29	3	1	33	1	7	7	7	6	6	5	4	42	6	6	5	7	6	7
006	1	3	10	1	24	1	2	2	1	1	1	1	1	1	1	1	2	2	2	1	2	1	1	1	1	2	1	1	2	2	29	3	2	34	0	7	7	7	6	6	5	4	42	7	7	6	6	7	6
007	1	6	8	15	46	1	1	1	2	1	3	3	2	1	1	2	1	1	1	1	2	2	1	3	2	1	1	2	2	1	36	3	1	40	0	7	7	7	6	6	6	4	43	6	6	6	6	6	6
088	20	4	7	1	25	4	1	1	1	1	1	2	1	1	1	1	1	1	1	1	1	1	1	1	1	1	1	1	1	1	23	4	1	28	0	7	7	7	5	6	6	5	43	6	7	6	7	6	6
020	1	8	6	2	29	1	2	1	1	1	1	1	1	2	1	1	1	1	1	1	1	1	2	1	1	1	1	1	1	1	24	4	1	29	0	7	6	7	6	6	6	5	43	6	7	6	6	6	6
082	20	6	21	10	39	1	2	1	2	2	2	1	1	1	1	1	1	1	1	1	1	1	1	1	1	1	1	1	1	1	25	2	1	28	0	7	7	7	6	6	6	4	43	7	7	6	7	5	7
017	1	6	8	20	51	1	1	1	1	1	1	2	2	1	1	1	1	1	1	1	1	1	1	1	1	1	1	1	1	2	25	2	1	28	0	7	7	7	4	6	7	5	43	6	7	5	7	7	6
036	1	4	7	24	54	1	2	1	2	2	1	1	1	1	1	1	1	1	2	1	1	1	1	1	1	1	1	1	1	1	25	2	1	28	0	7	7	7	6	6	6	5	44	6	7	6	7	6	6
066	3	1	1	10	36	1	1	1	1	1	1	2	1	1	1	1	1	1	1	2	1	1	1	1	1	2	1	1	1	1	25	3	1	29	0	7	7	7	6	5	7	4	43	6	7	4	7	7	7
070	3	4	4	4	29	1	2	1	2	2	1	1	1	1	1	1	1	1	2	1	1	1	1	1	1	1	1	1	1	1	25	4	1	30	0	7	6	7	6	6	6	4	42	7	7	5	7	7	7
081	20	4	13	5	29	1	2	1	1	1	1	2	1	3	1	1	1	1	1	1	1	1	1	1	1	1	1	1	1	1	25	3	2	30	0	7	7	7	6	6	6	4	43	7	7	6	7	5	7
109	5	8	17	8	34	2	2	1	1	1	1	1	1	1	1	1	2	1	2	2	1	1	2	1	1	1	1	1	1	1	26	3	1	30	0	7	7	6	6	6	6	5	43	6	7	5	7	7	6
102	4	10	14	1	24	3	1	2	1	1	1	1	1	1	1	1	1	2	1	2	1	1	1	1	1	1	1	1	1	1	24	3	1	28	0	7	7	7	6	6	7	5	45	6	7	5	7	6	7
107	5	8	4	1	27	3	2	1	1	1	1	1	1	1	1	1	1	2	1	1	1	1	2	1	1	1	1	1	1	1	24	3	1	28	0	7	7	7	6	6	7	5	45	6	7	6	6	6	6
038	1	4	7	20	50	1	2	2	1	2	1	2	1	1	1	1	1	1	1	1	2	1	1	1	1	1	1	1	1	1	25	2	1	28	0	7	7	7	6	5	6	5	43	6	7	5	7	7	7
035	1	12	19	21	51	1	2	2	1	1	1	1	1	1	1	2	1	1	1	1	1	1	1	1	2	2	1	1	2	1	26	2	1	29	0	7	7	7	6	6	6	5	44	7	7	5	7	7	6
055	2	14	18	1	27	2	2	1	1	1	1	1	2	1	1	1	1	1	1	1	1	1	1	1	1	2	1	1	2	1	25	4	1	30	0	7	7	7	6	6	6	4	43	7	7	5	6	7	7
044	1	3	17	2	27	3	2	2	1	1	1	1	1	1	1	1	1	2	1	1	1	1	3	1	1	1	1	1	1	1	25	4	1	30	0	7	7	7	6	5	6	5	43	7	7	6	7	6	6
106	5	8	12	20	50	2	2	1	1	1	1	1	1	2	1	1	2	2	1	1	2	1	1	1	1	2	1	1	1	1	27	2	1	30	0	7	7	7	6	6	6	4	43	6	7	5	7	7	7
027	1	4	3	2	28	1	2	1	1	1	1	1	1	1	1	1	1	1	1	1	1	1	1	1	1	1	1	1	1	1	22	3	1	26	0	7	7	7	6	6	7	6	46	6	7	6	6	6	6
046	1	6	5	13	43	1	1	1	2	1	1	1	1	1	1	1	1	1	1	1	1	1	1	1	1	1	1	1	1	1	23	2	1	26	0	7	7	6	7	6	7	6	46	6	7	5	7	6	6
034	1	6	5	14	41	1	2	1	1	1	1	1	1	1	1	1	1	1	2	1	1	1	1	1	1	1	1	1	1	1	23	2	1	26	0	6	7	7	6	7	7	6	46	7	7	3	7	7	6
127	21	4	17	1	27	1	2	1	1	1	1	1	1	1	1	1	1	1	1	1	1	1	1	2	1	1	1	2	1	1	24	2	1	27	0	7	7	7	6	7	7	5	46	6	7	5	7	6	7
067	3	1	1	3	29	1	2	1	1	1	1	1	1	2	1	1	1	1	1	1	1	1	1	1	1	1	1	1	1	2	24	3	1	28	0	7	7	7	6	6	7	5	45	7	7	6	7	5	7
083	20	16	25	33	61	1	1	1	1	1	1	1	1	1	1	2	1	1	1	1	1	1	1	1	1	1	1	1	1	1	23	3	2	28	0	7	7	7	6	6	7	5	45	6	7	5	7	7	6
134	21	4	12	35	61	1	2	1	1	2	2	1	1	1	1	1	1	1	1	2	1	1	1	1	1	1	1	1	1	1	25	2	1	28	0	7	7	7	6	6	6	4	43	6	7	6	7	7	7
068	20	8	24	1	27	5	2	1	1	1	1	1	1	1	1	1	2	2	2	1	1	1	1	1	1	1	1	1	2	1	26	2	1	29	0	7	7	7	6	6	7	4	44	7	7	5	7	6	7
091	20	9	8	1	28	5	2	1	1	1	1	1	1	1	1	1	1	1	1	1	1	1	2	2	1	1	1	2	1	1	25	3	1	29	0	7	7	7	6	6	6	5	44	7	7	5	7	6	7
037	1	11	18	3	29	1	2	1	1	1	1	1	1	2	1	2	1	1	1	1	1	1	1	1	1	1	3	1	1	1	26	3	1	30	0	7	7	7	6	6	5	4	42	7	7	6	7	7	7
079	3	4	21	14	43	1	1	1	1	2	1	1	1	1	2	1	2	2	2	1	1	1	1	1	1	1	1	1	1	1	27	2	1	30	0	7	7	7	6	6	6	4	43	6	7	6	7	7	7
092	20	9	8	1	28	4	2	1	1	1	1	1	1	1	1	1	1	1	1	1	1	1	1	1	1	1	1	1	1	1	22	2	1	25	0	7	7	7	6	7	7	6	47	6	7	6	6	6	6
103	5	8	12	1	27	3	2	1	1	1	1	1	1	1	1	1	1	1	1	1	1	1	1	1	1	1	1	1	1	1	22	3	1	26	0	7	7	7	6	7	6	5	45	7	7	6	7	6	6
062	20	15	21	5	32	1	1	1	1	1	1	1	1	1	1	1	1	1	1	1	1	1	1	1	1	1	1	1	1	1	22	3	1	26	0	7	7	6	6	7	7	6	46	6	7	4	7	7	7
072	3	7	11	7	31	1	1	2	1	1	1	2	1	1	1	1	1	1	1	1	1	1	1	1	1	1	1	1	1	1	23	2	1	26	0	7	7	7	6	7	7	6	47	7	6	4	7	6	7
032	1	6	5	15	46	1	1	1	1	1	1	1	2	1	1	1	1	1	1	1	1	1	1	1	1	1	1	1	1	1	23	2	1	26	0	7	7	7	7	7	7	6	48	7	7	4	7	6	6
010	1	10	14	1	24	3	2	2	1	1	1	1	1	1	1	1	1	1	1	1	1	1	1	1	1	1	1	1	2	1	23	3	1	27	0	7	6	7	7	7	7	6	47	6	7	5	7	6	7
053	2	13	20	1	27	2	1	1	1	1	1	1	1	1	1	1	1	1	1	1	1	1	2	1	1	1	1	1	1	1	23	3	1	27	0	7	7	7	7	7	7	5	47	6	7	6	7	6	6
050	1	4	3	3	29	1	2	1	1	1	1	1	1	1	1	1	1	1	1	1	1	1	2	1	1	1	1	1	1	1	23	3	1	27	0	7	7	7	6	7	7	6	47	6	7	6	6	6	6
132	21	16	17	10	36	1	1	1	1	1	1	1	1	3	1	1	1	1	1	1	1	1	1	1	1	1	1	1	1	1	24	2	1	27	0	7	7	7	6	7	7	5	46	7	7	6	7	6	7
131	21	8	12	12	40	1	2	1	1	2	1	2	1	1	1	1	1	1	1	1	1	1	1	1	1	1	1	1	1	1	24	2	1	27	0	7	7	6	6	7	7	5	45	6	7	6	6	7	7
074	3	2	22	27	56	1	1	2	1	1	1	1	1	1	1	1	1	1	1	1	1	1	1	2	1	1	2	1	1	1	24	2	1	27	0	7	7	7	6	7	7	5	46	7	7	6	7	5	7
123	5	4	12	1	25	3	1	1	1	1	1	1	1	2	1	1	1	1	1	1	1	1	1	1	1	1	1	1	1	1	23	4	1	28	0	7	7	7	6	7	6	5	45	7	7	5	6	7	7
041	1	4	7	2	28	3	2	1	1	1	1	1	1	1	1	1	1	1	1	1	1	1	2	1	1	1	1	1	1	2	24	3	1	28	0	7	7	7	6	7	7	4	45	7	7	5	7	6	7
071	3	1	1	4	29	1	2	1	1	1	1	1	1	1	1	1	1	1	1	2	1	1	1	1	1	1	1	2	1	1	24	3	1	28	0	7	7	7	6	6	6	5	44	6	7	6	7	7	7
033	1	13	20	5	30	1	2	1	1	1	1	1	1	1	1	1	1	3	1	1	1	1	2	1	1	1	1	1	1	1	25	2	1	28	0	7	7	7	6	7	6	5	45	7	7	6	7	6	6
059	20	8	4	5	32	1	2	1	1	1	1	2	1	1	1	1	1	2	1	1	1	1	1	1	1	2	1	1	1	1	25	2	1	28	0	7	7	7	6	6	7	5	45	7	7	5	7	7	7
030	1	6	8	7	31	1	2	1	2	2	2	1	1	1	1	1	1	1	1	1	1	1	1	1	1	1	1	1	1	1	25	2	1	28	0	7	7	7	6	7	7	5	46	6	6	6	7	7	7
063	20	11	18	18	48	1	2	1	2	2	1	1	1	1	1	1	1	1	1	1	1	1	1	1	1	1	1	1	1	1	24	3	1	28	0	7	7	7	6	7	6	5	45	6	7	5	7	7	7
052	1	4	4	20	50	1	1	2	1	1	1	2	1	1	1	1	1	2	1	1	1	1	1	1	1	2	1	1	1	1	25	2	1	28	0	7	7	7	6	6	7	5	45	7	7	5	6	7	7
048	1	4	4	20	50	1	2	2	1	1	1	1	1	1	1	1	2	1	1	1	1	1	1	1	1	1	1	1	1	1	23	3	2	28	0	7	7	7	6	7	6	5	45	7	7	5	7	7	7
086	20	16	3	1	27	1	2	1	1	1	1	1	1	1	1	1	1	1	1	1	1	1	1	1	1	1	1	1	1	1	22	2	1	25	0	7	7	6	7	7	7	6	47	7	7	5	7	6	7
073	3	7	11	7	31	1	1	2	1	1	1	2	1	1	1	1	1	1	1	1	1	1	1	1	1	1	1	1	1	1	23	2	1	26	0	7	6	7	6	6	7	6	45	7	7	6	7	7	7
031	1	6	5	12	40	1	2	1	1	1	1	1	1	1	1	1	1	1	2	1	1	1	1	1	1	1	1	1	1	1	23	2	1	26	0	6	7	7	6	6	6	6	44	7	7	6	7	7	7
049	1	6	5	13	42	1	1	1	1	1	1	1	1	1	1	1	1	1	2	1	1	1	1	1	1	1	1	1	1	1	23	2	1	26	0	7	7	7	6	7	7	6	47	6	7	5	7	6	7
075	3	2	17	3	29	1	1	2	1	1	1	2	1	1	1	1	1	1	1	1	1	1	1	1	1	2	1	1	1	1	24	2	1	27	0	7	7	7	6	7	7	5	46	6	7	6	7	7	7
028	1	1	1	5	29	1	1	1	1	1	1	1	1	1	1	1	1	1	1	1	1	1	2	1	1	1	1	1	1	1	23	3	1	27	0	7	7	7	7	7	6	6	47	7	7	5	6	7	7
045	1	3	2	18	48	1	1	2	1	1	1	2	1	1	1	2	1	1	1	1	1	1	1	1	1	1	1	1	1	1	24	2	1	27	0	7	7	7	7	7	6	6	47	7	7	5	7	7	7
016	1	3	9	20	50	1	1	2	2	1	1	1	1	1	1	1	1	1	1	1	1	1	1	1	1	1	1	1	1	1	23	3	1	27	0	7	7	7	7	7	6	6	47	6	7	5	7	7	7
047	1	8	16	25	55	1	2	1	1	2	1	1	1	1	1	1	1	1	1	1	1	1	1	1	1	1	1	1	1	1	23	3	1	27	0	7	7	7	7	7	6	6	47	6	7	5	7	7	6
026	1	5	3	30	59	1	2	1	1	1	1	1	1	1	1	1	1	1	1	1	1	1	2	1	1	1	1	1	2	1	24	2	1	27	0	7	7	7	6	6	6	5	44	7	6	7	7	7	7
087	20	16	21	1	28	4	2	1	1	1	1	1	1	1	1	1	1	1	1	1	1	1	1	1	1	1	1	1	2	2	24	3	1	28	0	7	7	7	6	7	7	5	46	7	7	5	7	6	7
054	2	11	18	1	26	2	2	1	1	1	1	1	1	1	1	1	1	1	1	1	1	1	1	1	1	1	1	1	1	1	22	2	1	25	0	7	7	6	7	7	7	6	47	7	7	5	7	7	6
076	3	4	21	5	30	1	2	1	1	1	1	1	1	1	1	1	1	1	1	1	1	1	1	1	1	1	1	1	1	1	22	2	1	25	0	7	7	7	6	7	7	6	47	7	7	6	7	7	6
051	1	6	5	15	45	1	2	1	1	1	1	1	1	1	1	1	1	1	1	1	1	1	1	1	1	1	1	1	1	1	22	2	1	25	0	7	7	7	6	7	7	6	47	7	7	5	7	7	7
012	1	4	7	30	58	1	2	1	1	1	1	1	1	1	1	1	1	1	1	1	1	1	1	1	1	1	1	1	1	1	22	2	1	25	0	7	6	7	7	7	7	6	47	6	7	5	7	7	7
085	20	16	21	1	28	4	1	1	1	1	1	1	1	1	1	1	1	1	1	1	1	1	1	1	1	1	1	1	1	1	22	3	1	26	0	7	7	7	7	7	6	5	46	7	7	6	7	6	7
097	20	8	13	1	27	5	2	1	1	1	1	1	1	1	1	1	1	1	1	1	1	1	1	1	1	1	1	1	2	1	23	2	1	26	0	7	7	6	7	7	7	6	47	7	7	5	7	6	7
095	20	11	18	2	27	2	1	1	1	1	1	1	1	1	1	1	1	1	1	1	1	1	1	1	1	1	1	1	1	1	22	3	1	26	0	6	7	7	7	7	7	6	47	7	7	6	7	7	7
080	20	4	10	30	58	1	1	1	1	1	1	1	1	1	1	1	1	1	1	1	1	1	1	1	1	1	1	1	1	1	22	2	2	26	0	7	7	7	6	7	7	6	47	7	7	5	7	6	7
077	3	16	17	1	27	1	2	1	1	1	1	1	1	1	1	1	1	1	1	1	1	1	1	1	1	1	1	1	1	1	22	2	1	25	0	7	7	7	6	7	7	6	47	7	7	6	7	7	7
060	20	9	8	4	32	5	2	1	1	1	1	1	1	1	1	1	1	1	1	1	1	1	1	1	1	1	1	1	1	1	22	2	1	25	0	7	7	7	6	7	7	6	47	6	7	6	7	7	7
025	1	6	21	12	40	1	2	1	1	1	1	1	1	1	1	1	1	1	1	1	1	1	1	1	1	1	1	1	1	1	22	2	1	25	0	7	7	7	7	7	7	6	48	7	7	5	6	7	7
090	20	16	13	1	28	4	2	1	1	1	1	1	1	1	1	1	1	1	1	1	1	1	1	1	1	1	1	1	1	1	22	3	1	26	0	7	7	7	7	7	7	6	48	7	7	5	7	6	7
004	1	3	17	6	30	1	2	2	1	1	1	1	1	1	1	1	1	1	1	1	1	1	1	1	1	1	1	1	1	1	22	2	1	25	0	7	7	7	7	7	7	6	48	7	7	6	7	7	7
Caption:
Cod: participant's code; EESS: establishment code; Prof: Code of the profession; AreaW: Work area code; Tser: length of service; ED: Age; CondLab: employment status code; Sex: gender code; GO: occupational group code
[truncated: 5 more columns]
